# Supplementary material for: A New Method for Inferring Hidden Markov Models from Noisy Time Sequences
Source: PubMed Central journal article supplement (PMC3256161; doi:10.1371/journal.pone.0029703), 2012-01-11
Supplement: pone.0029703.s008.pdf [file pone.0029703.s008.pdf]

Table 1: Word frequencies

| Word | Frequency |
|------|-----------|
| 0    | 925       |
| 2    | 1826      |
| 4    | 1540      |
| 00   | 516       |
| 02   | 150       |
| 04   | 136       |
| 20   | 151       |
| 22   | 1251      |
| 24   | 153       |
| 40   | 142       |
| 42   | 155       |
| 44   | 1014      |
