# Supplementary material for: A New Method for Inferring Hidden Markov Models from Noisy Time Sequences
Source: PubMed Central journal article supplement (PMC3256161; doi:10.1371/journal.pone.0029703), 2012-01-11
Supplement: pone.0029703.s009.pdf [file pone.0029703.s009.pdf]

Table 1: The causal states and their assigned strings for  $l = 1$ .

| State 0 | State 1 | State 2 |
|---------|---------|---------|
| 0       | 2       | 4       |
