# Supplementary material for: A New Method for Inferring Hidden Markov Models from Noisy Time Sequences
Source: PubMed Central journal article supplement (PMC3256161; doi:10.1371/journal.pone.0029703), 2012-01-11
Supplement: pone.0029703.s010.pdf [file pone.0029703.s010.pdf]

Table 1: The causal states and their assigned strings for  $l = 2$ .

| State 0 | State 1 | State 2 | State 3 | State 4 |
|---------|---------|---------|---------|---------|
| 0       | 2       | 4       | 20      | 40      |
| 00      | 02      | 04      |         |         |
|         | 22      | 24      |         |         |
|         | 42      | 44      |         |         |
