# Supplementary material for: A New Method for Inferring Hidden Markov Models from Noisy Time Sequences
Source: PubMed Central journal article supplement (PMC3256161; doi:10.1371/journal.pone.0029703), 2012-01-11
Supplement: pone.0029703.s011.pdf [file pone.0029703.s011.pdf]

Table 1: The causal states and their assigned strings for  $l = 3$ .

| State 0 | State 1 | State 2 | State 3 | State 4 |
|---------|---------|---------|---------|---------|
| 0       | 2       | 4       | 20      | 40      |
| 00      | 02      | 04      | 200     | 400     |
| 000     | 22      | 24      | 020     | 040     |
|         | 42      | 44      | 220     | 240     |
|         | 002     | 004     | 420     | 440     |
|         | 202     | 404     |         |         |
|         | 022     | 024     |         |         |
|         | 222     | 224     |         |         |
|         | 422     | 424     |         |         |
|         | 042     | 044     |         |         |
|         | 242     | 244     |         |         |
|         | 442     | 444     |         |         |
